# Supplementary material for: Bioeffects of Prunus spinosa L. fruit ethanol extract on reproduction and phenotypic plasticity of Trichoplax adhaerens Schulze, 1883 (Placozoa)
Source: PeerJ. 2019 Apr 18;7:e6789. doi: 10.7717/peerj.6789 (PMC6475577; doi:10.7717/peerj.6789)
Supplement: Figure S1 — Non linear logistic regression growth curve. X axis: culture days; Y axis: Placozoa number. [file peerj-07-6789-s001.xls]

## Sheet: elab davide
DATA	days	EtOH	P + EtOH	CTRL											x	EtOH regr	P + EtOH regr	CTRL regr
2017-08-03	0	14	8	8											0	15.1845	1.67918	8.72102
2017-08-04	1	11	8	12											1	15.1867	2.13937	8.79524
2017-08-08	5	9	8	11											2	15.1901	2.64649	8.88365
2017-08-15	12	14	7	10											3	15.1951	3.20524	8.98896
2017-08-21	18	39	6	17											4	15.2027	3.82077	9.11437
2017-08-27	24	65	24	29											5	15.214	4.49874	9.26369
2017-08-28	25	108	41	32											6	15.231	5.24533	9.44142
2017-08-31	28	197	75	49											7	15.2564	6.06729	9.65291
2017-09-04	32	311	122	89											8	15.2945	6.97201	9.90449
2017-09-11	39	377	134	135											9	15.3517	7.96757	10.2036
2017-09-18	46	355	259	189											10	15.4373	9.06275	10.5591
															11	15.5656	10.2671	10.9813
Logistic curve	y=x0+xmax/(1+exp(a*x+b))														12	15.7577	11.5911	11.4824
															13	16.0454	13.046	12.0767
															14	16.4758	14.6441	12.7806
Best-fit values							15.18	-2.796	8.334						15	17.119	16.3986	13.6136
x0		15.18	-2.796	8.334			352.2	662.7	207.8						16	18.0789	18.3239	14.5977
xmax		352.2	662.7	207.8			-0.4049	-0.09858	-0.1758						17	19.5081	20.4352	15.7586
a		-0.4049	-0.09858	-0.1758											18	21.629	22.7493	17.1252
b		17.34	6.47	8.922											19	24.7604	25.2837	18.7303
Std. Error															20	29.3501	28.0574	20.6104
x0		5.236	17.34	2.736											21	36.0049	31.0904	22.8056
xmax		10.16	1093	16.38											22	45.5047	34.4041	25.3592
a		0.04048	0.05773	0.02039											23	58.7681	38.0207	28.3168
b		1.699	1.258	0.8825											24	76.7234	41.9639	31.7251
95% Confidence Intervals															25	100.041	46.2578	35.6303
x0		2.794 to 27.56	-43.81 to 38.22	1.863 to 14.81											26	128.742	50.928	40.0753
xmax		328.2 to 376.3	-1923 to 3249	169.1 to 246.6											27	161.825	56.0001	45.0966
a		-0.5006 to -0.3092	-0.2351 to 0.03795	-0.2241 to -0.1276											28	197.195	61.5005	50.7211
b		13.33 to 21.36	3.494 to 9.446	6.834 to 11.01											29	232.093	67.4556	56.9615
Goodness of Fit															30	263.904	73.8917	63.8124
Degrees of Freedom		7	7	7											31	290.873	80.8341	71.2471
R square		0.9959	0.9596	0.9951											32	312.367	88.3073	79.2144
Absolute Sum of Squares		892.6	2608	178.6											33	328.671	96.334	87.6385
Sy.x		11.29	19.3	5.051											34	340.579	104.935	96.4196
															35	349.038	114.127	105.438
Number of points															36	354.929	123.924	114.561
Analyzed		11	11	11											37	358.976	134.336	123.648
															38	361.729	145.366	132.561
															39	363.59	157.015	141.174
															40	364.843	169.273	149.377
															41	365.684	182.125	157.081
															42	366.247	195.549	164.222
															43	366.623	209.515	170.764
															44	366.875	223.984	176.69
															45	367.043	238.909	182.005
															46	367.155	254.238	186.728
