# Supplementary material for: Bioeffects of Prunus spinosa L. fruit ethanol extract on reproduction and phenotypic plasticity of Trichoplax adhaerens Schulze, 1883 (Placozoa)
Source: PeerJ. 2019 Apr 18;7:e6789. doi: 10.7717/peerj.6789 (PMC6475577; doi:10.7717/peerj.6789)
Supplement: Figure S3 [file peerj-07-6789-s002.xls]

## Sheet: Foglio1
Treatment	PC1	PC2															ellipses
0	1.69196	-1.55085														a	1.37		1.69		2.09
0	-0.13862	-0.23864														b	0.76		0.55		0.72
0	0.37364	-0.60398														alpha	2.60054		0.977384		1.0472
0	0.45727	-1.06781														xt	0.86		0.47		-0.94
0	0.0752	-0.94116														yt	-1.19		0.9		0.42
0	-0.0857	-0.63324													alpha	rad	x	y	x	y	x	y
0	1.03638	-0.58268													0	0	-0.314319	-0.484398	1.41504	2.30107	0.104996	2.23
0	0.58958	-0.29992													1	0.0174533	-0.320972	-0.495875	1.40693	2.30623	0.0939542	2.236
0	1.914	-1.01247													2	0.0349066	-0.327264	-0.507563	1.39855	2.31095	0.0825978	2.24146
0	0.55672	-1.63064													3	0.0523599	-0.333196	-0.519459	1.38988	2.31525	0.0709299	2.24636
0	1.47848	-1.61981													4	0.0698132	-0.338763	-0.531559	1.38093	2.31911	0.0589541	2.2507
0	0.60367	-0.32958													5	0.0872665	-0.343966	-0.54386	1.3717	2.32255	0.046674	2.25448
0	1.80945	-1.78681													6	0.10472	-0.348802	-0.556358	1.3622	2.32555	0.0340934	2.25771
0	0.14671	-0.7775													7	0.122173	-0.353269	-0.569049	1.35242	2.32811	0.021216	2.26038
0	0.21716	-0.69536													8	0.139626	-0.357367	-0.581929	1.34238	2.33024	0.00804586	2.26248
1	0.757	0.76456													9	0.15708	-0.361094	-0.594994	1.33207	2.33194	-0.00541308	2.26403
1	1.13709	1.94392													10	0.174533	-0.36445	-0.60824	1.3215	2.33319	-0.0191567	2.26501
1	0.48809	1.08005													11	0.191986	-0.367432	-0.621664	1.31067	2.33402	-0.0331808	2.26543
1	0.05715	-0.54268													12	0.20944	-0.37004	-0.63526	1.29958	2.3344	-0.0474812	2.26529
1	0.74761	1.01637													13	0.226893	-0.372274	-0.649026	1.28824	2.33435	-0.0620534	2.26459
1	1.01778	2.22235													14	0.244346	-0.374132	-0.662957	1.27666	2.33386	-0.076893	2.26332
1	0.07204	-0.03744													15	0.261799	-0.375614	-0.677048	1.26482	2.33293	-0.0919956	2.2615
1	0.92324	1.40639													16	0.279253	-0.37672	-0.691295	1.25274	2.33157	-0.107356	2.25911
1	0.47936	0.42777													17	0.296706	-0.37745	-0.705694	1.24043	2.32977	-0.122971	2.25616
1	0.31632	1.17855													18	0.314159	-0.377802	-0.720241	1.22788	2.32754	-0.138834	2.25265
1	0.25419	0.60291													19	0.331613	-0.377777	-0.73493	1.2151	2.32487	-0.154942	2.24859
1	0.70399	1.14546													20	0.349066	-0.377376	-0.749759	1.20209	2.32177	-0.171288	2.24397
1	-0.74579	0.04068													21	0.366519	-0.376597	-0.764721	1.18886	2.31823	-0.187869	2.23879
1	0.11681	0.33781													22	0.383972	-0.375442	-0.779813	1.17541	2.31427	-0.204679	2.23306
1	0.16003	0.55765													23	0.401426	-0.37391	-0.79503	1.16175	2.30987	-0.221713	2.22677
2	-1.11718	0.10944													24	0.418879	-0.372002	-0.810368	1.14787	2.30504	-0.238965	2.21994
2	-0.76076	0.34931													25	0.436332	-0.36972	-0.825821	1.13379	2.29978	-0.256431	2.21256
2	-1.03795	0.17041													26	0.453786	-0.367062	-0.841385	1.11951	2.2941	-0.274106	2.20463
2	-2.02444	-1.11906													27	0.471239	-0.364031	-0.857055	1.10503	2.28799	-0.291983	2.19615
2	-1.65108	0.18037													28	0.488692	-0.360627	-0.872826	1.09035	2.28146	-0.310058	2.18714
2	-1.32646	1.24653													29	0.506145	-0.356851	-0.888694	1.07549	2.27451	-0.328324	2.17759
2	-1.84282	-0.59631													30	0.523599	-0.352705	-0.904654	1.06044	2.26714	-0.346777	2.1675
2	-1.2547	-0.06454													31	0.541052	-0.348189	-0.920701	1.04521	2.25936	-0.36541	2.15688
2	-0.41439	0.61568													32	0.558505	-0.343305	-0.93683	1.02981	2.25116	-0.384219	2.14573
2	-1.57846	-0.57882													33	0.575959	-0.338054	-0.953036	1.01423	2.24255	-0.403197	2.13406
2	-0.75502	-0.12699													34	0.593412	-0.332439	-0.969314	0.998495	2.23353	-0.422338	2.12186
2	-0.26609	1.23061													35	0.610865	-0.32646	-0.985659	0.982594	2.2241	-0.441637	2.10915
2	-0.86092	-1.08756													36	0.628319	-0.32012	-1.00207	0.966537	2.21427	-0.461088	2.09592
2	-0.67606	-0.2024													37	0.645772	-0.313421	-1.01853	0.950329	2.20404	-0.480685	2.08218
2	-1.84937	-0.51827													38	0.663225	-0.306364	-1.03505	0.933975	2.19341	-0.500421	2.06793
2	0.20487	2.0177													39	0.680678	-0.298952	-1.05161	0.917479	2.18239	-0.520292	2.05319
															40	0.698132	-0.291186	-1.06822	0.900847	2.17098	-0.54029	2.03794
															41	0.715585	-0.28307	-1.08486	0.884084	2.15918	-0.56041	2.0222
															42	0.733038	-0.274606	-1.10154	0.867195	2.147	-0.580646	2.00597
															43	0.750492	-0.265797	-1.11824	0.850184	2.13443	-0.600991	1.98927
															44	0.767945	-0.256644	-1.13497	0.833058	2.12149	-0.62144	1.97208
															45	0.785398	-0.247151	-1.15171	0.815821	2.10818	-0.641985	1.95442
															46	0.802851	-0.237321	-1.16846	0.798479	2.0945	-0.662622	1.93629
															47	0.820305	-0.227157	-1.18522	0.781037	2.08046	-0.683342	1.9177
															48	0.837758	-0.216661	-1.20198	0.7635	2.06606	-0.704141	1.89865
															49	0.855211	-0.205838	-1.21874	0.745874	2.0513	-0.725012	1.87916
															50	0.872665	-0.19469	-1.23549	0.728164	2.03619	-0.745949	1.85922
															51	0.890118	-0.18322	-1.25222	0.710375	2.02074	-0.766944	1.83884
															52	0.907571	-0.171433	-1.26894	0.692512	2.00494	-0.787992	1.81803
															53	0.925025	-0.159332	-1.28563	0.674583	1.98881	-0.809086	1.79679
															54	0.942478	-0.14692	-1.30229	0.65659	1.97235	-0.830221	1.77513
															55	0.959931	-0.134202	-1.31892	0.638541	1.95556	-0.851389	1.75306
															56	0.977384	-0.12118	-1.33551	0.620441	1.93845	-0.872583	1.73059
															57	0.994838	-0.10786	-1.35205	0.602294	1.92102	-0.893799	1.70771
															58	1.01229	-0.0942449	-1.36855	0.584108	1.90328	-0.915028	1.68445
															59	1.02974	-0.0803392	-1.38499	0.565886	1.88523	-0.936265	1.6608
															60	1.0472	-0.066147	-1.40137	0.547636	1.86689	-0.957503	1.63677
															61	1.06465	-0.0516727	-1.41769	0.529362	1.84825	-0.978736	1.61237
															62	1.0821	-0.0369207	-1.43393	0.511069	1.82932	-0.999957	1.5876
															63	1.09956	-0.0218955	-1.45011	0.492765	1.81011	-1.02116	1.56248
															64	1.11701	-0.00660167	-1.4662	0.474453	1.79062	-1.04234	1.53701
															65	1.13446	0.00895615	-1.48221	0.45614	1.77086	-1.06348	1.51121
															66	1.15192	0.0247732	-1.49813	0.437831	1.75083	-1.08459	1.48507
															67	1.16937	0.0408447	-1.51396	0.419532	1.73055	-1.10566	1.4586
															68	1.18682	0.0571657	-1.52969	0.401248	1.71001	-1.12667	1.43182
															69	1.20428	0.0737312	-1.54531	0.382985	1.68923	-1.14763	1.40473
															70	1.22173	0.0905363	-1.56083	0.364749	1.6682	-1.16853	1.37734
															71	1.23918	0.107576	-1.57623	0.346545	1.64694	-1.18935	1.34966
															72	1.25664	0.124844	-1.59152	0.328378	1.62546	-1.2101	1.3217
															73	1.27409	0.142337	-1.60668	0.310255	1.60375	-1.23077	1.29346
															74	1.29154	0.160048	-1.62172	0.29218	1.58183	-1.25134	1.26496
															75	1.309	0.177972	-1.63663	0.274159	1.5597	-1.27183	1.23619
															76	1.32645	0.196105	-1.6514	0.256199	1.53737	-1.29221	1.20718
															77	1.3439	0.214439	-1.66602	0.238303	1.51485	-1.31249	1.17793
															78	1.36136	0.23297	-1.68051	0.220477	1.49213	-1.33265	1.14845
															79	1.37881	0.251692	-1.69484	0.202728	1.46924	-1.35269	1.11875
															80	1.39626	0.270599	-1.70902	0.18506	1.44618	-1.3726	1.08883
															81	1.41372	0.289686	-1.72305	0.167479	1.42295	-1.39239	1.05871
															82	1.43117	0.308947	-1.73691	0.14999	1.39955	-1.41204	1.0284
															83	1.44862	0.328375	-1.7506	0.132599	1.37601	-1.43154	0.997898
															84	1.46608	0.347966	-1.76412	0.11531	1.35232	-1.45089	0.967222
															85	1.48353	0.367712	-1.77747	0.0981298	1.3285	-1.47009	0.93638
															86	1.50098	0.387608	-1.79064	0.0810624	1.30454	-1.48913	0.90538
															87	1.51844	0.407648	-1.80363	0.0641136	1.28046	-1.50799	0.874233
															88	1.53589	0.427826	-1.81643	0.0472884	1.25627	-1.52669	0.842947
															89	1.55334	0.448136	-1.82903	0.0305919	1.23196	-1.54521	0.811532
															90	1.5708	0.468571	-1.84145	0.0140293	1.20756	-1.56354	0.779998
															91	1.58825	0.489125	-1.85366	-0.00239437	1.18306	-1.58168	0.748355
															92	1.6057	0.509793	-1.86568	-0.0186742	1.15847	-1.59963	0.716611
															93	1.62316	0.530567	-1.87748	-0.0348051	1.13381	-1.61738	0.684777
															94	1.64061	0.551441	-1.88908	-0.0507823	1.10907	-1.63492	0.652863
															95	1.65806	0.572409	-1.90047	-0.0666009	1.08427	-1.65224	0.620877
															96	1.67552	0.593465	-1.91163	-0.082256	1.05942	-1.66936	0.58883
															97	1.69297	0.614602	-1.92258	-0.0977428	1.03452	-1.68624	0.556732
															98	1.71042	0.635814	-1.93331	-0.113057	1.00957	-1.70291	0.524592
															99	1.72788	0.657094	-1.94381	-0.128193	0.984593	-1.71934	0.492421
															100	1.74533	0.678436	-1.95408	-0.143147	0.95959	-1.73553	0.460227
															101	1.76278	0.699833	-1.96411	-0.157915	0.934568	-1.75148	0.428021
															102	1.78024	0.721279	-1.97391	-0.172491	0.909536	-1.76718	0.395812
															103	1.79769	0.742768	-1.98348	-0.186871	0.884501	-1.78263	0.363611
															104	1.81514	0.764292	-1.9928	-0.201051	0.85947	-1.79782	0.331427
															105	1.8326	0.785845	-2.00187	-0.215027	0.834452	-1.81276	0.29927
															106	1.85005	0.807421	-2.0107	-0.228794	0.809454	-1.82742	0.26715
															107	1.8675	0.829012	-2.01928	-0.242349	0.784483	-1.84182	0.235077
															108	1.88496	0.850614	-2.02761	-0.255686	0.759548	-1.85594	0.203059
															109	1.90241	0.872218	-2.03568	-0.268802	0.734655	-1.86979	0.171108
															110	1.91986	0.893818	-2.04349	-0.281694	0.709813	-1.88334	0.139233
															111	1.93732	0.915408	-2.05104	-0.294356	0.685029	-1.89662	0.107443
															112	1.95477	0.936981	-2.05833	-0.306785	0.66031	-1.9096	0.0757485
															113	1.97222	0.958531	-2.06536	-0.318978	0.635664	-1.92228	0.0441587
															114	1.98968	0.98005	-2.07212	-0.330931	0.611099	-1.93467	0.0126834
															115	2.00713	1.00153	-2.07861	-0.342639	0.586621	-1.94675	-0.0186678
															116	2.02458	1.02297	-2.08483	-0.3541	0.562239	-1.95853	-0.0498854
															117	2.04204	1.04436	-2.09078	-0.36531	0.53796	-1.97	-0.0809598
															118	2.05949	1.0657	-2.09645	-0.376266	0.513792	-1.98115	-0.111882
															119	2.07694	1.08697	-2.10185	-0.386963	0.489741	-1.99198	-0.142642
															120	2.0944	1.10817	-2.10697	-0.3974	0.465815	-2.0025	-0.17323
															121	2.11185	1.1293	-2.11181	-0.407573	0.442021	-2.01269	-0.203638
															122	2.1293	1.15034	-2.11637	-0.417478	0.418367	-2.02255	-0.233856
															123	2.14675	1.1713	-2.12065	-0.427113	0.394859	-2.03209	-0.263874
															124	2.16421	1.19216	-2.12464	-0.436474	0.371505	-2.04129	-0.293684
															125	2.18166	1.21292	-2.12835	-0.44556	0.348312	-2.05016	-0.323277
															126	2.19911	1.23357	-2.13177	-0.454366	0.325288	-2.05869	-0.352644
															127	2.21657	1.25411	-2.13491	-0.462891	0.302438	-2.06687	-0.381775
															128	2.23402	1.27453	-2.13776	-0.471132	0.279771	-2.07472	-0.410662
															129	2.25147	1.29483	-2.14032	-0.479086	0.257292	-2.08222	-0.439296
															130	2.26893	1.31499	-2.14259	-0.486751	0.235009	-2.08937	-0.467668
															131	2.28638	1.33501	-2.14457	-0.494125	0.212929	-2.09617	-0.49577
															132	2.30383	1.35488	-2.14626	-0.501205	0.191058	-2.10262	-0.523592
															133	2.32129	1.37461	-2.14766	-0.507989	0.169402	-2.10871	-0.551128
															134	2.33874	1.39418	-2.14876	-0.514475	0.14797	-2.11445	-0.578367
															135	2.35619	1.41359	-2.14958	-0.520661	0.126766	-2.11983	-0.605303
															136	2.37365	1.43283	-2.1501	-0.526546	0.105799	-2.12485	-0.631926
															137	2.3911	1.45189	-2.15033	-0.532127	0.0850725	-2.12951	-0.658229
															138	2.40855	1.47077	-2.15027	-0.537403	0.0645947	-2.13381	-0.684203
															139	2.42601	1.48947	-2.14991	-0.542371	0.0443714	-2.13775	-0.709841
															140	2.44346	1.50797	-2.14926	-0.547032	0.0244087	-2.14132	-0.735135
															141	2.46091	1.52628	-2.14832	-0.551383	0.00471273	-2.14452	-0.760076
															142	2.47837	1.54439	-2.14709	-0.555422	-0.0147105	-2.14736	-0.784659
															143	2.49582	1.56229	-2.14557	-0.559149	-0.0338552	-2.14983	-0.808874
															144	2.51327	1.57997	-2.14376	-0.562563	-0.0527153	-2.15193	-0.832715
															145	2.53073	1.59743	-2.14165	-0.565662	-0.0712853	-2.15366	-0.856175
															146	2.54818	1.61467	-2.13926	-0.568446	-0.0895594	-2.15502	-0.879246
															147	2.56563	1.63168	-2.13657	-0.570913	-0.107532	-2.15601	-0.901921
															148	2.58309	1.64845	-2.1336	-0.573064	-0.125198	-2.15663	-0.924193
															149	2.60054	1.66499	-2.13034	-0.574896	-0.142551	-2.15688	-0.946056
															150	2.61799	1.68128	-2.12679	-0.576411	-0.159587	-2.15676	-0.967503
															151	2.63545	1.69731	-2.12296	-0.577606	-0.1763	-2.15627	-0.988527
															152	2.6529	1.7131	-2.11885	-0.578483	-0.192686	-2.15541	-1.00912
															153	2.67035	1.72862	-2.11445	-0.57904	-0.208738	-2.15418	-1.02928
															154	2.68781	1.74388	-2.10977	-0.579277	-0.224453	-2.15258	-1.049
															155	2.70526	1.75887	-2.10481	-0.579195	-0.239825	-2.15061	-1.06827
															156	2.72271	1.77359	-2.09957	-0.578793	-0.25485	-2.14827	-1.08709
															157	2.74017	1.78802	-2.09405	-0.578072	-0.269523	-2.14556	-1.10545
															158	2.75762	1.80218	-2.08826	-0.577032	-0.28384	-2.14248	-1.12334
															159	2.77507	1.81605	-2.08219	-0.575672	-0.297797	-2.13904	-1.14076
															160	2.79253	1.82962	-2.07586	-0.573995	-0.311388	-2.13524	-1.15771
															161	2.80998	1.8429	-2.06925	-0.571999	-0.324611	-2.13107	-1.17418
															162	2.82743	1.85589	-2.06238	-0.569685	-0.33746	-2.12653	-1.19016
															163	2.84489	1.86856	-2.05524	-0.567055	-0.349933	-2.12164	-1.20565
															164	2.86234	1.88094	-2.04783	-0.564109	-0.362024	-2.11638	-1.22065
															165	2.87979	1.893	-2.04017	-0.560849	-0.373732	-2.11077	-1.23515
															166	2.89725	1.90474	-2.03224	-0.557274	-0.385051	-2.1048	-1.24914
															167	2.9147	1.91617	-2.02406	-0.553386	-0.395979	-2.09848	-1.26262
															168	2.93215	1.92727	-2.01563	-0.549186	-0.406512	-2.0918	-1.2756
															169	2.94961	1.93806	-2.00694	-0.544676	-0.416647	-2.08477	-1.28805
															170	2.96706	1.94851	-1.99801	-0.539857	-0.426381	-2.0774	-1.29998
															171	2.98451	1.95863	-1.98882	-0.534731	-0.435712	-2.06967	-1.3114
															172	3.00197	1.96841	-1.9794	-0.529298	-0.444635	-2.06161	-1.32228
															173	3.01942	1.97786	-1.96973	-0.523561	-0.453148	-2.0532	-1.33263
															174	3.03687	1.98697	-1.95983	-0.517521	-0.46125	-2.04445	-1.34245
															175	3.05433	1.99574	-1.94969	-0.51118	-0.468937	-2.03536	-1.35173
															176	3.07178	2.00415	-1.93933	-0.504541	-0.476207	-2.02595	-1.36047
															177	3.08923	2.01222	-1.92873	-0.497605	-0.483057	-2.0162	-1.36867
															178	3.10669	2.01994	-1.91791	-0.490373	-0.489486	-2.00612	-1.37633
															179	3.12414	2.02731	-1.90686	-0.48285	-0.495492	-1.99572	-1.38344
															180	3.14159	2.03432	-1.8956	-0.475036	-0.501073	-1.985	-1.39
															181	3.15905	2.04097	-1.88413	-0.466934	-0.506228	-1.97395	-1.396
															182	3.1765	2.04726	-1.87244	-0.458547	-0.510954	-1.9626	-1.40146
															183	3.19395	2.0532	-1.86054	-0.449877	-0.51525	-1.95093	-1.40636
															184	3.21141	2.05876	-1.84844	-0.440927	-0.519115	-1.93895	-1.4107
															185	3.22886	2.06397	-1.83614	-0.431699	-0.522547	-1.92667	-1.41448
															186	3.24631	2.0688	-1.82364	-0.422197	-0.525547	-1.91409	-1.41771
															187	3.26377	2.07327	-1.81095	-0.412423	-0.528112	-1.90122	-1.42038
															188	3.28122	2.07737	-1.79807	-0.40238	-0.530242	-1.88805	-1.42248
															189	3.29867	2.08109	-1.78501	-0.392072	-0.531936	-1.87459	-1.42403
															190	3.31613	2.08445	-1.77176	-0.3815	-0.533195	-1.86084	-1.42501
															191	3.33358	2.08743	-1.75834	-0.37067	-0.534016	-1.84682	-1.42543
															192	3.35103	2.09004	-1.74474	-0.359583	-0.534401	-1.83252	-1.42529
															193	3.36849	2.09227	-1.73097	-0.348244	-0.534349	-1.81795	-1.42459
															194	3.38594	2.09413	-1.71704	-0.336655	-0.53386	-1.80311	-1.42332
															195	3.40339	2.09561	-1.70295	-0.324821	-0.532934	-1.788	-1.4215
															196	3.42085	2.09672	-1.68871	-0.312744	-0.531572	-1.77264	-1.41911
															197	3.4383	2.09745	-1.67431	-0.30043	-0.529774	-1.75703	-1.41616
															198	3.45575	2.0978	-1.65976	-0.28788	-0.52754	-1.74117	-1.41265
															199	3.47321	2.09778	-1.64507	-0.2751	-0.524871	-1.72506	-1.40859
															200	3.49066	2.09738	-1.63024	-0.262092	-0.521769	-1.70871	-1.40397
															201	3.50811	2.0966	-1.61528	-0.248862	-0.518233	-1.69213	-1.39879
															202	3.52557	2.09544	-1.60019	-0.235413	-0.514265	-1.67532	-1.39306
															203	3.54302	2.09391	-1.58497	-0.221748	-0.509867	-1.65829	-1.38677
															204	3.56047	2.092	-1.56963	-0.207873	-0.505039	-1.64103	-1.37994
															205	3.57792	2.08972	-1.55418	-0.193792	-0.499783	-1.62357	-1.37256
															206	3.59538	2.08706	-1.53862	-0.179508	-0.4941	-1.60589	-1.36463
															207	3.61283	2.08403	-1.52295	-0.165027	-0.487993	-1.58802	-1.35615
															208	3.63028	2.08063	-1.50717	-0.150352	-0.481463	-1.56994	-1.34714
															209	3.64774	2.07685	-1.49131	-0.135488	-0.474513	-1.55168	-1.33759
															210	3.66519	2.0727	-1.47535	-0.12044	-0.467143	-1.53322	-1.3275
															211	3.68264	2.06819	-1.4593	-0.105212	-0.459357	-1.51459	-1.31688
															212	3.7001	2.0633	-1.44317	-0.0898084	-0.451158	-1.49578	-1.30573
															213	3.71755	2.05805	-1.42696	-0.0742345	-0.442546	-1.4768	-1.29406
															214	3.735	2.05244	-1.41069	-0.0584948	-0.433526	-1.45766	-1.28186
															215	3.75246	2.04646	-1.39434	-0.0425942	-0.424099	-1.43836	-1.26915
															216	3.76991	2.04012	-1.37793	-0.0265374	-0.414269	-1.41891	-1.25592
															217	3.78736	2.03342	-1.36147	-0.0103293	-0.404039	-1.39932	-1.24218
															218	3.80482	2.02636	-1.34495	0.00602501	-0.393411	-1.37958	-1.22793
															219	3.82227	2.01895	-1.32839	0.0225207	-0.38239	-1.35971	-1.21319
															220	3.83972	2.01119	-1.31178	0.0391527	-0.370978	-1.33971	-1.19794
															221	3.85718	2.00307	-1.29514	0.0559159	-0.359179	-1.31959	-1.1822
															222	3.87463	1.99461	-1.27846	0.0728053	-0.346996	-1.29935	-1.16597
															223	3.89208	1.9858	-1.26176	0.0898156	-0.334433	-1.27901	-1.14927
															224	3.90954	1.97664	-1.24503	0.106942	-0.321494	-1.25856	-1.13208
															225	3.92699	1.96715	-1.22829	0.124179	-0.308184	-1.23801	-1.11442
															226	3.94444	1.95732	-1.21154	0.141521	-0.294505	-1.21738	-1.09629
															227	3.9619	1.94716	-1.19478	0.158963	-0.280462	-1.19666	-1.0777
															228	3.97935	1.93666	-1.17802	0.1765	-0.26606	-1.17586	-1.05865
															229	3.9968	1.92584	-1.16126	0.194126	-0.251302	-1.15499	-1.03916
															230	4.01426	1.91469	-1.14451	0.211836	-0.236194	-1.13405	-1.01922
															231	4.03171	1.90322	-1.12778	0.229625	-0.22074	-1.11306	-0.998839
															232	4.04916	1.89143	-1.11106	0.247488	-0.204944	-1.09201	-0.978027
															233	4.06662	1.87933	-1.09437	0.265417	-0.188812	-1.07091	-0.95679
															234	4.08407	1.86692	-1.07771	0.28341	-0.172348	-1.04978	-0.935134
															235	4.10152	1.8542	-1.06108	0.301459	-0.155558	-1.02861	-0.913064
															236	4.11898	1.84118	-1.04449	0.319559	-0.138446	-1.00742	-0.890589
															237	4.13643	1.82786	-1.02795	0.337706	-0.121018	-0.986201	-0.867714
															238	4.15388	1.81424	-1.01145	0.355892	-0.103278	-0.964972	-0.844448
															239	4.17134	1.80034	-0.995013	0.374114	-0.0852332	-0.943735	-0.820796
															240	4.18879	1.78615	-0.978631	0.392364	-0.0668881	-0.922497	-0.796766
															241	4.20624	1.77167	-0.962314	0.410638	-0.0482485	-0.901264	-0.772365
															242	4.2237	1.75692	-0.946066	0.428931	-0.0293201	-0.880043	-0.747601
															243	4.24115	1.7419	-0.929893	0.447235	-0.0101085	-0.858841	-0.722482
															244	4.2586	1.7266	-0.913799	0.465547	0.00938022	-0.837663	-0.697014
															245	4.27606	1.71104	-0.897789	0.48386	0.0291403	-0.816516	-0.671207
															246	4.29351	1.69523	-0.881868	0.502169	0.0491656	-0.795407	-0.645067
															247	4.31096	1.67916	-0.866041	0.520468	0.0694501	-0.774341	-0.618602
															248	4.32842	1.66283	-0.850312	0.538752	0.0899876	-0.753327	-0.591821
															249	4.34587	1.64627	-0.834687	0.557015	0.110772	-0.732369	-0.564732
															250	4.36332	1.62946	-0.81917	0.575251	0.131796	-0.711474	-0.537343
															251	4.38078	1.61242	-0.803766	0.593455	0.153055	-0.690649	-0.509662
															252	4.39823	1.59516	-0.78848	0.611622	0.174541	-0.6699	-0.481698
															253	4.41568	1.57766	-0.773316	0.629745	0.196248	-0.649234	-0.45346
															254	4.43314	1.55995	-0.758279	0.64782	0.21817	-0.628655	-0.424955
															255	4.45059	1.54203	-0.743374	0.665841	0.240299	-0.608172	-0.396193
															256	4.46804	1.5239	-0.728604	0.683801	0.262629	-0.58779	-0.367183
															257	4.4855	1.50556	-0.713975	0.701697	0.285154	-0.567515	-0.337932
															258	4.50295	1.48703	-0.699492	0.719523	0.307865	-0.547353	-0.308451
															259	4.5204	1.46831	-0.685157	0.737272	0.330757	-0.527312	-0.278748
															260	4.53786	1.4494	-0.670976	0.75494	0.353823	-0.507395	-0.248832
															261	4.55531	1.43031	-0.656954	0.772521	0.377054	-0.487611	-0.218712
															262	4.57276	1.41105	-0.643094	0.79001	0.400445	-0.467964	-0.188398
															263	4.59022	1.39162	-0.6294	0.807401	0.423988	-0.448462	-0.157898
															264	4.60767	1.37203	-0.615877	0.82469	0.447677	-0.429108	-0.127222
															265	4.62512	1.35229	-0.602529	0.84187	0.471503	-0.409911	-0.0963801
															266	4.64258	1.33239	-0.58936	0.858938	0.495459	-0.390875	-0.0653804
															267	4.66003	1.31235	-0.576374	0.875886	0.519539	-0.372006	-0.034233
															268	4.67748	1.29217	-0.563575	0.892712	0.543734	-0.35331	-0.00294711
															269	4.69494	1.27186	-0.550967	0.909408	0.568039	-0.334793	0.0284676
															270	4.71239	1.25143	-0.538553	0.925971	0.592444	-0.316461	0.0600015
															271	4.72984	1.23087	-0.526338	0.942394	0.616943	-0.298318	0.0916451
															272	4.7473	1.21021	-0.514325	0.958674	0.641528	-0.280371	0.123389
															273	4.76475	1.18943	-0.502517	0.974805	0.666192	-0.262625	0.155223
															274	4.7822	1.16856	-0.490919	0.990782	0.690927	-0.245085	0.187137
															275	4.79966	1.14759	-0.479535	1.0066	0.715726	-0.227756	0.219123
															276	4.81711	1.12653	-0.468366	1.02226	0.740581	-0.210645	0.25117
															277	4.83456	1.1054	-0.457417	1.03774	0.765484	-0.193756	0.283268
															278	4.85202	1.08419	-0.446692	1.05306	0.790429	-0.177094	0.315408
															279	4.86947	1.06291	-0.436193	1.06819	0.815407	-0.160664	0.347579
															280	4.88692	1.04156	-0.425923	1.08315	0.84041	-0.144472	0.379773
															281	4.90438	1.02017	-0.415887	1.09791	0.865432	-0.128522	0.411979
															282	4.92183	0.998721	-0.406086	1.11249	0.890464	-0.11282	0.444188
															283	4.93928	0.977232	-0.396523	1.12687	0.915499	-0.0973692	0.476389
															284	4.95674	0.955708	-0.387203	1.14105	0.94053	-0.0821753	0.508573
															285	4.97419	0.934155	-0.378127	1.15503	0.965548	-0.0672427	0.54073
															286	4.99164	0.912579	-0.369298	1.16879	0.990546	-0.0525759	0.57285
															287	5.00909	0.890988	-0.36072	1.18235	1.01552	-0.0381794	0.604923
															288	5.02655	0.869386	-0.352394	1.19569	1.04045	-0.0240576	0.636941
															289	5.044	0.847782	-0.344323	1.2088	1.06534	-0.0102149	0.668892
															290	5.06145	0.826182	-0.33651	1.22169	1.09019	0.00334469	0.700767
															291	5.07891	0.804592	-0.328956	1.23436	1.11497	0.0166169	0.732557
															292	5.09636	0.783019	-0.321665	1.24679	1.13969	0.0295977	0.764252
															293	5.11381	0.761469	-0.314639	1.25898	1.16434	0.0422831	0.795841
															294	5.13127	0.73995	-0.307879	1.27093	1.1889	0.0546694	0.827317
															295	5.14872	0.718466	-0.301388	1.28264	1.21338	0.0667526	0.858668
															296	5.16617	0.697026	-0.295168	1.2941	1.23776	0.0785292	0.889885
															297	5.18363	0.675636	-0.28922	1.30531	1.26204	0.0899955	0.92096
															298	5.20108	0.654302	-0.283546	1.31627	1.28621	0.101148	0.951882
															299	5.21853	0.63303	-0.278149	1.32696	1.31026	0.111984	0.982642
															300	5.23599	0.611828	-0.273029	1.3374	1.33419	0.122499	1.01323
															301	5.25344	0.590701	-0.268189	1.34757	1.35798	0.13269	1.04364
															302	5.27089	0.569656	-0.263629	1.35748	1.38163	0.142554	1.07386
															303	5.28835	0.5487	-0.259352	1.36711	1.40514	0.152089	1.10387
															304	5.3058	0.527838	-0.255358	1.37647	1.42849	0.161292	1.13368
															305	5.32325	0.507078	-0.251649	1.38556	1.45169	0.170158	1.16328
															306	5.34071	0.486425	-0.248226	1.39437	1.47471	0.178687	1.19264
															307	5.35816	0.465886	-0.245089	1.40289	1.49756	0.186875	1.22178
															308	5.37561	0.445467	-0.242241	1.41113	1.52023	0.194719	1.25066
															309	5.39307	0.425174	-0.239681	1.41909	1.54271	0.202218	1.2793
															310	5.41052	0.405014	-0.23741	1.42675	1.56499	0.209369	1.30767
															311	5.42797	0.384992	-0.23543	1.43412	1.58707	0.21617	1.33577
															312	5.44543	0.365116	-0.23374	1.4412	1.60894	0.222618	1.36359
															313	5.46288	0.345389	-0.232342	1.44799	1.6306	0.228713	1.39113
															314	5.48033	0.32582	-0.231236	1.45448	1.65203	0.234451	1.41837
															315	5.49779	0.306413	-0.230421	1.46066	1.67323	0.239832	1.4453
															316	5.51524	0.287175	-0.229899	1.46655	1.6942	0.244854	1.47193
															317	5.53269	0.268111	-0.229669	1.47213	1.71493	0.249514	1.49823
															318	5.55015	0.249228	-0.229732	1.4774	1.73541	0.253812	1.5242
															319	5.5676	0.230531	-0.230087	1.48237	1.75563	0.257747	1.54984
															320	5.58505	0.212025	-0.230735	1.48703	1.77559	0.261316	1.57513
															321	5.60251	0.193717	-0.231675	1.49138	1.79529	0.26452	1.60008
															322	5.61996	0.175612	-0.232907	1.49542	1.81471	0.267357	1.62466
															323	5.63741	0.157715	-0.23443	1.49915	1.83386	0.269826	1.64887
															324	5.65487	0.140032	-0.236245	1.50256	1.85272	0.271926	1.67272
															325	5.67232	0.122568	-0.23835	1.50566	1.87129	0.273658	1.69617
															326	5.68977	0.10533	-0.240745	1.50845	1.88956	0.275019	1.71925
															327	5.70723	0.0883206	-0.243429	1.51091	1.90753	0.276011	1.74192
															328	5.72468	0.0715466	-0.246401	1.51306	1.9252	0.276632	1.76419
															329	5.74213	0.0550128	-0.249661	1.5149	1.94255	0.276882	1.78606
															330	5.75959	0.0387242	-0.253207	1.51641	1.95959	0.276762	1.8075
															331	5.77704	0.0226858	-0.257039	1.51761	1.9763	0.276272	1.82853
															332	5.79449	0.00690248	-0.261154	1.51848	1.99269	0.27541	1.84912
															333	5.81195	-0.00862101	-0.265553	1.51904	2.00874	0.274179	1.86928
															334	5.8294	-0.0238799	-0.270233	1.51928	2.02445	0.272577	1.889
															335	5.84685	-0.0388696	-0.275194	1.5192	2.03982	0.270607	1.90827
															336	5.86431	-0.0535854	-0.280433	1.51879	2.05485	0.268267	1.92709
															337	5.88176	-0.068023	-0.285949	1.51807	2.06952	0.26556	1.94545
															338	5.89921	-0.0821779	-0.291741	1.51703	2.08384	0.262485	1.96334
															339	5.91667	-0.0960458	-0.297806	1.51567	2.0978	0.259044	1.98076
															340	5.93412	-0.109622	-0.304143	1.51399	2.11139	0.255238	1.99771
															341	5.95157	-0.122904	-0.31075	1.512	2.12461	0.251067	2.01418
															342	5.96903	-0.135886	-0.317624	1.50969	2.13746	0.246534	2.03016
															343	5.98648	-0.148564	-0.324765	1.50706	2.14993	0.241639	2.04565
															344	6.00393	-0.160936	-0.332168	1.50411	2.16202	0.236385	2.06065
															345	6.02139	-0.172996	-0.339834	1.50085	2.17373	0.230772	2.07515
															346	6.03884	-0.184742	-0.347758	1.49727	2.18505	0.224803	2.08914
															347	6.05629	-0.196169	-0.355939	1.49339	2.19598	0.218478	2.10262
															348	6.07375	-0.207275	-0.364373	1.48919	2.20651	0.211801	2.1156
															349	6.0912	-0.218055	-0.37306	1.48468	2.21665	0.204773	2.12805
															350	6.10865	-0.228508	-0.381995	1.47986	2.22638	0.197396	2.13998
															351	6.12611	-0.238628	-0.391176	1.47473	2.23571	0.189673	2.1514
															352	6.14356	-0.248414	-0.400601	1.4693	2.24463	0.181606	2.16228
															353	6.16101	-0.257863	-0.410266	1.46356	2.25315	0.173197	2.17263
															354	6.17847	-0.266971	-0.420168	1.45752	2.26125	0.164449	2.18245
															355	6.19592	-0.275735	-0.430305	1.45118	2.26894	0.155364	2.19173
															356	6.21337	-0.284154	-0.440674	1.44454	2.27621	0.145946	2.20047
															357	6.23083	-0.292224	-0.451271	1.4376	2.28306	0.136197	2.20867
															358	6.24828	-0.299943	-0.462092	1.43037	2.28949	0.12612	2.21633
															359	6.26573	-0.307309	-0.473136	1.42285	2.29549	0.115719	2.22344
															360	6.28319	-0.314319	-0.484398	1.41504	2.30107	0.104996	2.23
